# Supplementary material
Source: PubMed Central journal article supplement (PMC11335038)
Supplement: NIHMS1906711-supplement-supplement.pdf [file NIHMS1906711-supplement-supplement.pdf]

## Supplementary Appendix

Supplement to: Turner NC, Oliveira M, Howell SJ, et al. Capivasertib in hormone receptor–positive advanced breast cancer. *N Engl J Med* 2023;388:2058-70. DOI: 10.1056/NEJMoa2214131

This appendix has been provided by the authors to give readers additional information about the work.

## CONTENTS

|                                                                                                                                                                                                                                                                                                                                                                |    |
|----------------------------------------------------------------------------------------------------------------------------------------------------------------------------------------------------------------------------------------------------------------------------------------------------------------------------------------------------------------|----|
| <i>INVESTIGATORS</i> .....                                                                                                                                                                                                                                                                                                                                     | 3  |
| <i>ACKNOWLEDGMENTS</i> .....                                                                                                                                                                                                                                                                                                                                   | 7  |
| <i>SUPPLEMENTAL FIGURES</i> .....                                                                                                                                                                                                                                                                                                                              | 8  |
| Figure S1. Study overview (consort diagram). .....                                                                                                                                                                                                                                                                                                             | 8  |
| Figure S2. Investigator-assessed progression-free survival in A) patients with AKT pathway non-altered tumors including unknown NGS result (per protocol) and B) patients with AKT pathway non-altered tumors excluding unknown NGS result (exploratory analysis), and C) only patients with unknown NGS result ( <i>post-hoc</i> exploratory analysis). ..... | 9  |
| Figure S3. Investigator-assessed progression-free survival by subgroup in patients with AKT pathway-altered tumors. ....                                                                                                                                                                                                                                       | 11 |
| Figure S4. Investigator-assessed progression-free survival in the overall population in A) patients with prior CDK4/6 inhibitor exposure and B) patients without prior CDK4/6 inhibitor exposure .....                                                                                                                                                         | 12 |
| Figure S5. Progression-free survival by blinded independent central review in A) the overall population and B) patients with AKT pathway-altered tumors. ....                                                                                                                                                                                                  | 13 |
| <i>SUPPLEMENTAL TABLES</i> .....                                                                                                                                                                                                                                                                                                                               | 14 |
| Table S1. AKT pathway alteration status by next-generation sequencing. ....                                                                                                                                                                                                                                                                                    | 14 |
| Table S2. Representativeness of Study Participants. ....                                                                                                                                                                                                                                                                                                       | 15 |
| Table S3. Summary of tumor response by investigator assessment and blinded independent central review. ....                                                                                                                                                                                                                                                    | 17 |
| Table S4. Serious adverse events in the overall population.* .....                                                                                                                                                                                                                                                                                             | 18 |
| <i>REFERENCES</i> .....                                                                                                                                                                                                                                                                                                                                        | 20 |

## INVESTIGATORS

The following investigators participated in the CAPItello-291 clinical trial:

- Argentina Luis Enrique Fein, Instituto de Oncología de Rosario, Rosario, Argentina  
Diego Lucas Kaen, CORI - Centro Oncológico Riojano Integral, La Rioja, Argentina  
Ruben Dario Kowalyszyn, Clinica Viedma, Viedma, Argentina  
Mirta Varela, Coiba S.A., Berazategui, Argentina  
Guillermo Luis Lerzo, Universidad de Buenos Aires - Facultad de Medicina - Fundacion CENIT, Buenos Aires, Argentina
- Australia Vanessa Wong, Ballarat Base Hospital, Ballarat Central, Australia  
Frances M. Boyle, Mater Hospital North Sydney, North Sydney, Australia  
Peter Fox, Orange Hospital, Orange, Australia  
George Kannourakis, Ballarat Oncology & Haematology Services, Wendouree, Australia  
Nicole McCarthy, Icon Cancer Care - South Brisbane, Herston, Australia  
Nicholas Murray, Royal Adelaide Hospital, Adelaide, Australia  
Meena Okera, Ashford Hospital, Kurrulta Park, Australia  
Andre van der Westhuizen, Calvary Mater Newcastle, Waratah, Australia  
Susie Bae, Maroondah Hospital, Ringwood East, Australia  
Annabel Goodwin, Concord Repatriation General Hospital, Concord, Australia  
Michelle Morris, Sunshine Coast University Private Hospital, Birtinya, Australia  
Susie Bae, Box Hill Hospital, Box Hill, Australia
- Belgium Claire Quaghebeur, Clinique et Maternité Sainte-Elisabeth, Namur, Belgium  
Jean-Luc Canon, Grand Hôpital de Charleroi - Hôpital Notre Dame, Charleroi, Belgium  
Luc Dirix, GZA Ziekenhuizen Campus Sint-Augustinus, Wilrijk, Belgium  
Francois Duhoux, Cliniques Universitaires Saint-Luc UCL Bruxelles, Bruxelles, Belgium  
Christel Fontaine, Universitair Ziekenhuis Brussel, Brussels, Belgium  
Konstantinos Papadimitriou, Antwerp University Hospital, Edegem, Belgium
- Canada Mihaela Mates, Kingston General Hospital - Cancer Centre of Southeastern Ontario, Kingston, Canada  
Saroj Niraula, CancerCare Manitoba, Winnipeg, Canada  
Rossanna C. Pezo, Sunnybrook Health Sciences Centre, Toronto, Canada  
Martina Puchyr, Humber River Hospital, North York, Canada  
Joanne Linda Yu, North York General Hospital, North York, Canada
- China Xinhong Wu, Hubei Cancer Hospital, Wuhan, China  
Wenyan Chen, The Third Hospital of Nanchang, Nanchang, China  
Danmei Pang, The First People's Hospital of Foshan, Foshan, China  
Aimin Zang, Affiliated Hospital of Hebei University, Baoding, China  
Jingfen Wang, Linyi Cancer Hospital, Linyi City, China  
Ou Jiang, The Second People's Hospital of Neijiang, Neijiang, China  
Zhiyong Wu, Sun Yat-sen University - Shantou Central Hospital, Shantou, China
- France Florence Dalenc, Institut Claudius Regaud, Toulouse, France  
Laetitia Stefani, Centre Hospitalier Annecy Genevois, Pringy, France  
Elisabeth Luporsi, Centre Hospitalier Régional Metz-Thionville, Metz, France  
Thierry Petit, Centre Paul Strauss, Strasbourg, France  
Anne-Claire Hardy-Bessard, Institut Claudius Regaud, Plérin, France  
Julien Peron, Centre Hospitalier Lyon-Sud, Pierre Benite, France  
Lucie Monceau-Baroux, CHRU Brest - Hôpital Morvan, Brest, France  
Guillaume Meynard, CHU Besançon - Hôpital Jean Minjot, Besançon, France  
Jean Christophe Thery, Centre Henri Becquerel, Rouen, France
- Germany Nadia Harbeck, Ludwig-Maximilians-Universität München - Augenklinik, Muenchen, Germany  
Joke Tio, Universitätsklinikum Münster Zentralklinikum, Münster, Germany  
Andreas Schneeweiss, Nationales Centrum für Tumorerkrankungen (NCT) Heidelberg, Germany  
Pia Wuelfing and Christian Schem, Mammazentrum Hamburg - Krankenhaus Jerusalem Location, Hamburg, Germany

Hans Tesch, Hämatologisch-Onkologische Gemeinschaftspraxis am Bethanien-Krankenhaus, Frankfurt am Main, Germany  
Peter A. Fasching, Universitätsklinikum Erlangen Frauenklinik, Erlangen, Germany  
Tjoun-Won Park-Simon, Medizinische Hochschule Hannover (MHH), Hannover, Germany  
Mattea Reinisch, Kliniken Essen - Mitte, Essen, Germany  
Pauline Wimberger, Universitätsklinikum Carl Gustav Carus Dresden, Klinik und Poliklinik für Frauenheilkunde und Geburtshilfe, Dresden, Germany  
Michael Braun, Rotkreuzklinikum München Frauenklinik, München, Germany  
Susanna Hegewisch-Becker, Facharztzentrum Eppendorf, Hamburg, Germany  
Isabell Witzel, Universitätsklinikum Hamburg-Eppendorf (UKE), Hamburg, Germany  
Michael Lux, St. Vincenz-Krankenhaus, Paderborn, Germany  
Marion Van Mackelenbergh, Universitätsklinikum Schleswig-Holstein, Kiel, Germany  
Dorothea Wiebke Fischer, Klinikum Ernst von Bergmann gGmbH, Potsdam, Germany  
Holger Fischer, Evangelische Kliniken Gelsenkirchen GmbH, Gelsenkirchen, Germany  
Frederik Marmé, Medizinischen Fakultät Mannheim der Universität Heidelberg, Mannheim, Germany  
Martin Griesshammer, Johannes Wesling Klinikum Minden, Minden, Germany

Hungary  
Yousuf B. Al-Farhat, Tolna Megyei Balassa Janos Kórház, Szekszárd, Hungary  
Peter Arkosy, University of Debrecen, Debrecen, Hungary  
Tibor Csozsi, Jász-Nagykún-Szolnok Megyei Hetényi Géza Kórház-Rendelőintézet, Szolnok, Hungary  
Zsuzsanna Papai, Magyar Honvédség Egészségügyi Központ Honvédkórház II, Budapest, Hungary  
Gabor Laszlo Rubovszky, Országos Onkológiai Intézet, Budapest, Hungary  
Zsolt Horvath, Bács-Kiskun Megyei Kórház, Kecskemét, Hungary

Israel  
Tamar Peretz, Hadassah Ein Karem Hospital, Jerusalem, Israel  
Karen Drumea and Shlomit Lubovsky, Rambam Medical Center, Haifa, Israel  
Amit Itay, Sheba Medical Center - Infectious Disease Unit, Ramat Gan, Israel  
Iryna Kuchuk, Meir Medical Center, Kfar Saba, Israel  
Rinat Yerushalmi, Rabin Medical Center - Beilinson Hospital, Petah-Tikva, Israel  
Samih Yousef, Emek Medical Center, Afula, Israel  
Gleb Kornev and Hadar Goldvaser, Shaare Zedek Medical Center, Jerusalem, Israel  
Margarita Tokar, Soroka Medical Center, Be'er Sheva, Israel

Italy  
Luigi Coltelli, Azienda USL 6 Livorno, Livorno, Italy  
Laura Biganzoli, Nuovo Ospedale di Prato, Prato, Italy  
Filippo Montemurro, Institute for Cancer Research and Treatment (IRCC), Candiolo, Italy  
Michele Orditura, AOU L. Vanvitelli Università degli Studi della Campania Luigi Vanvitelli, Napoli, Italy  
Ugo De Giorgi, Istituto Scientifico Romagnolo per lo Studio e la Cura dei Tumori - IRST IRCCS, Meldola, Italy  
Alberto Zambelli and Elena Rota Caremoli, ASST Papa Giovanni XXIII, Oncologia Medica, Bergamo, Italy  
Federico Piacentini, Azienda Ospedaliero - Universitaria di Modena Policlinico, Modena, Italy  
Marco Angelo Colleoni, Istituto Europeo di Oncologia, Milano, Italy  
Giuseppe Tonini, Policlinico Universitario Campus Bio-Medico, Roma, Italy  
Nicola Battelli, Ospedale Generale Provinciale Macerata, Macerata, Italy  
Pierosandro Tagliaferri, Università degli Studi "Magna Graecia" di Catanzaro, Catanzaro, Italy

Japan  
Kenichi Inoue, Saitama Cancer Center, Kitaadachi-gun, Japan  
Fumikata Hara, The Cancer Institute Hospital of Japanese Foundation for Cancer Research (JFCR), Koto-ku, Japan  
Hiroji Iwata, Aichi Cancer Center Hospital, Nagoya-shi, Japan  
Hiroyuki Yasojima, National Hospital Organization Osaka National Hospital, Osaka-Shi, Japan  
Toshiro Mizuno, Mie University Hospital, Tsu-Shi, Japan  
Takahiro Nakayama, Osaka International Cancer Institute, Osaka-Shi, Japan  
Mitsuya Itoh, Hiroshima City Hiroshima Citizens Hospital, Hiroshima-shi, Japan  
Akihiko Osaki, Saitama Medical University International Medical Center, Hidaka-shi, Japan  
Tetsuhiko Taira, Sagara Hospital, Kagoshima-Shi, Japan

Kenichi Watanabe, National Hospital Organization Hokkaido Cancer Center, Sapporo-shi, Japan  
Eriko Tokunaga, National Hospital Organization Kyushu Cancer Center, Minami-Ku, Fukuoka-Shi, Japan  
Tatsuya Toyama, Nagoya City University Hospital, Mizuho-Ku, Nagoya-Shi, Japan  
Yutaka Yamamoto, Kumamoto University Hospital, Chuo-Ku, Kumamoto-Shi, Japan  
Toshinari Yamashita, Kanagawa Cancer Center, Asahi-Ku, Yokohama-Shi, Japan  
Yasuhiro Yanagita, Gunma Prefectural Cancer Center, Ota-shi, Japan  
Kenjiro Aogi, National Hospital Organization Shikoku Cancer Center, Ko, Matsuyama-Shi, Japan  
Shigehira Saji, Fukushima Medical University Hospital, Fukushima-Shi, Japan  
Masato Takahashi, Hokkaido University Hospital, Sapporo-shi, Japan  
Seigo Nakamura, Showa University Hospital, Shinagawa-Ku, Tokyo-To, Japan  
Masahiro Takada and Masakazu Toi, Kyoto University Hospital, Kyoto-shi, Japan  
Rikiya Nakamura, Chiba Cancer Center, Chuo-Ku, Chiba-Shi, Japan  
South Korea  
Yeon Hee Park, Samsung Medical Center, Seoul, South Korea  
Byoung-Yong Shim, The Catholic University of Korea, Suwon, South Korea  
Jae Hong Seo, Korea University Guro Hospital, Seoul, South Korea  
Keon Uk Park, Keimyung University Dongsan Hospital, Daegu, South Korea  
Sung Hoon Sim, National Cancer Center, Gyeonggi-do, Goyang-si, South Korea  
Moon Hee Lee, Inha University Hospital, Incheon, South Korea  
Young Jin Choi, Pusan National University Hospital, Busan, South Korea  
Kyung Hae Jung, Asan Medical Center, Seoul, South Korea  
Joohyuk Sohn, Severance Hospital - Yonsei Cancer Center, Seoul, South Korea  
Jee Hyun Kim, Seoul National University Bundang Hospital, Seongnam-si, South Korea  
Seok Yun Kang, Ajou University Hospital, Suwon, South Korea  
Peru  
Renzo Luzgardo Alvarez Barreda, Centro Médico Monte Carmelo S.R.L., Urb. Victoria, Arequipa, Peru  
Henry L. Gomez, Clínica Oncosalud, Lima, Peru  
Poland  
Zbigniew I. Nowecki, Narodowy Instytut Onkologii im. Marii Skłodowskiej-Curie - Państwowy Instytut Badawczy, Warszawa, Poland  
Tomasz Kubiawski, Samodzielny Publiczny Zakład Opieki Zdrowotnej MSW z W-MCO w Olsztynie, Olsztyn, Poland  
Piotr J. Wysocki, Szpital Uniwersytecki w Krakowie, Kraków, Poland  
Bogdan Zurawski, Centrum Onkologii im. Prof. Franciszka Łukaszczyka w Bydgoszczy, Bydgoszcz, Poland  
Russia  
Mona A. Frolova, Federal State Institution "Russian Cancer Research Center named after N. N. Blokhin" RAMS, Moscow, Russia  
Anna Tarasova, Samara Regional Clinical Cancer Center, Promyshlenniy Rayon, Samara, Russia  
Lyudmila Zhukova, Moscow Clinical Scientific Center, Moskva, Russia  
Petr V. Krivorotko, Petrov Research Institute of Oncology, Kurortniy Rayon, Peterburg, Russia  
Dmitry Kirtbaya, State Medical Institution Oncology Center # 2, Sochi, Russia  
Rashida Vahidovna Orlova, Saint Petersburg State Healthcare Institution City Clinical Oncology Dispensary, Sankt-Peterburg, Russia  
Spain  
Alexandra Cortegoso, Complejo Hospitalario Universitario de Santiago (CHUS) - Hospital Clínico Universitario, Santiago de Compostela, Spain  
Angel Guerrero Zotano, Fundación Instituto Valenciano de Oncología (IVO), Valencia, Spain  
Eva Ciruelos Gil, Hospital Universitario 12 de Octubre, Madrid, Spain  
Maria Martinez Garcia, Hospital del Mar, Barcelona, Spain  
Mafalda Oliveira, Hospital Universitario Vall d'Hebron, Barcelona, Spain  
Manuel Ramos, El Centro Oncológico de Galicia, La Coruna, Spain  
Manuel Ruiz-Borrego, Hospital Universitario Virgen del Rocío, Sevilla, Spain  
Serafin Morales Murillo, Hospital Universitari Arnau de Vilanova de Lleida, Lleida, Spain  
Agostina Stradella and Silvia Vazquez Fernandez, Institut Catala d'Oncologia Hospitalet, L'hospitalet de Llobregat, Spain  
Maria Gion Cortes, Hospital Ruber Internacional, Madrid, Spain

Josefina Cruz-Jurado, Hospital Universitario De Canarias, San Cristóbal de la Laguna, Spain  
 Isabel Calvo Plaza, MD Anderson Cancer Center - Madrid, Madrid, Spain  
 Pedro Sanchez Rovira, Complejo Hospitalario de Jaén, Jaén, Spain  
 Andres Poveda Velasco, Hospital Quiron Valencia, Valencia, Spain  
 Jose Angel Garcia Saenz, Hospital Clínico San Carlos, Madrid, Spain  
 Juan Antonio Virizuela Echaburu, Hospital Quiron Sagrado Corazon, Seville, Spain  
 Jose Juan Illarramendi Mañas, Complejo Hospitalario de Navarra, Pamplona, Spain  
 Yolanda Jerez Gilarranz, Hospital General Universitario Gregorio Marañón, Madrid, Spain  
 Pilar Zamora Aunon, Hospital Universitario La Paz, Madrid, Spain  
 Blanca Cantos, Hospital Universitario Puerta de Hierro - Majadahonda, Madrid, Spain  
 Mireia Mele Olive, Hospital Universitari Sant Joan de Reus, Reus, Spain  
 Juan de la Haba, Hospital Universitario Reina Sofía, Cordoba, Spain  
 Nuria Ribelles, Hospital Universitario Virgen de la Victoria, Málaga, Spain  
 Taiwan Yen-Shen Lu, National Taiwan University Hospital, Taipei, Taiwan  
 Hwei-Chung Wang, China Medical University Hospital, Taichung, Taiwan  
 Shin-Cheh Chen, Chang Gung Medical Foundation - Linkou Branch, Taoyuan Hsien, Taiwan  
 Ling-Ming Tseng, Taipei Veterans General Hospital, Taipei, Taiwan  
 Wei-Pang Chung, National Cheng Kung University Hospital, Tainan City, Taiwan  
 Chi-Feng Chung, Koo Foundation Sun Yat-Sen Cancer Center, Taipei, Taiwan  
 Kun-Ming Rau, E-DA Cancer Hospital, Taiwan  
 Yin-Hsun Feng, Chi Mei Medical Center, Yongkang, Tainan, Taiwan  
 United Kingdom Sacha J. Howell, The Christie NHS Foundation Trust, Manchester, United Kingdom  
 Maria Esther Una Cidon, The Royal Bournemouth and Christchurch Hospitals NHS Foundation Trust - Royal Bournemouth Hospital, Bournemouth, United Kingdom  
 Amna Sheri, The Royal Free London NHS Foundation Trust - The Royal Free Hospital, Royal Free Hospital, London,  
 Nicholas C Turner and Sophie McGrath, The Royal Marsden – Breast Unit, Sutton, United Kingdom  
 Daniel John Nelmes, Gloucestershire Hospitals NHS Foundation Trust - Cheltenham General Hospital, Cheltenham, United Kingdom  
 Jeremy Braybrooke, University Hospitals Bristol NHS Foundation Trust - Bristol Haematology and Oncology Centre, Bristol, United Kingdom  
 Simon Waters, Velindre Cancer Centre, Cardiff, United Kingdom  
 Trevor A. McGoldrick, NHS Grampian - Aberdeen Royal Infirmary, Aberdeen, United Kingdom  
 United States Sibel H. Blau Rainier Hematology-Oncology, Puyallup, WA, United States  
 Stephanie Graff and Mohammad Mozayen, Research Medical Center, Kansas City, MO, United States  
 Erika P. Hamilton, Sarah Cannon Research Institute (SCRI) (The SCRI Oncology Research Consortium), Nashville, TN, United States  
 Lowell L. Hart, Florida Cancer Specialists & Research Institute - Colonial Office, Fort Myers, United States  
 Chrystal Landry and Ruby Sharma, Northwell Health - Centers for Advanced Medicine, New Hyde Park, NY, United States  
 Priyanka Sharma, University of Kansas Cancer Center - The Richard and Annette Bloch Cancer Care Pavilion, Westwood, United States  
 Eddie Thara and Omkar S. Marathe, The Oncology Institute of Hope and Innovation - Whittier, Whittier, CA, United States  
 William J. Irvin, Bon Secours Cancer Institute Medical Oncology - St. Francis, Midlothian, VA, United States  
 Brooke R. Daniel, Tennessee Oncology - Chattanooga Oncology & Hematology Associates, Chattanooga, TN, United States  
 Vinay Gudena, Cone Health Cancer Center, Greensboro, NC, United States  
 Yu Cao, Tufts Medical Center, Boston, United States  
 Foluso O. Ademuyiwa, Washington University School of Medicine - Center for Advanced Medicine (CAM), St. Louis, MO, United States  
 Paul Coluzzi, University of California Irvine Medical Center (UCIMC) - Chao Family Comprehensive Cancer Center, Orange, CA, United States

Katherine H. Rak-Tkaczuk, University of Maryland - Marlene and Stewart Greenebaum Cancer Center, Baltimore, MD, United States  
Jeffrey Neidhart, San Juan Oncology Associates, Farmington, NM, United States  
Paula Klein, Beth Israel Comprehensive Cancer Center- West Campus, New York, NY, United States  
Lida Mina and Qing Zhao, Banner MD Anderson Cancer Center, Gilbert, AZ, United States  
Eleonora Teplinsky, The Valley Hospital - The Robert and Audrey Luckow Pavilion, Paramus, United States  
Hope S. Rugo, University of California, San Francisco, CA, United States  
Joyce O'Shaughnessy, Texas Oncology - Baylor Charles A. Sammons Cancer Center, Dallas, TX, United States  
Konstandinos Sideras, Mayo Clinic Hospital - Florida, Jacksonville, FL, United States  
Karthik V. Giridhar, Mayo Clinic Cancer Center (MCCC) - Rochester, Rochester, MN, United States

## ACKNOWLEDGMENTS

The authors would also like to thank the investigator Dr Zbigniew Nowecki, M.D., Ph.D. (The Maria Skłodowska Curie Memorial Cancer Center and Institute of Oncology, Warsaw, Poland) for their considerable contribution to patient recruitment, care and data acquisition in this study.

Capivasertib was discovered by AstraZeneca after a collaboration with Astex Therapeutics (and its partnership with the Institute of Cancer Research and Cancer Research Technology Limited).

## SUPPLEMENTAL FIGURES

Figure S1. Study overview (consort diagram).

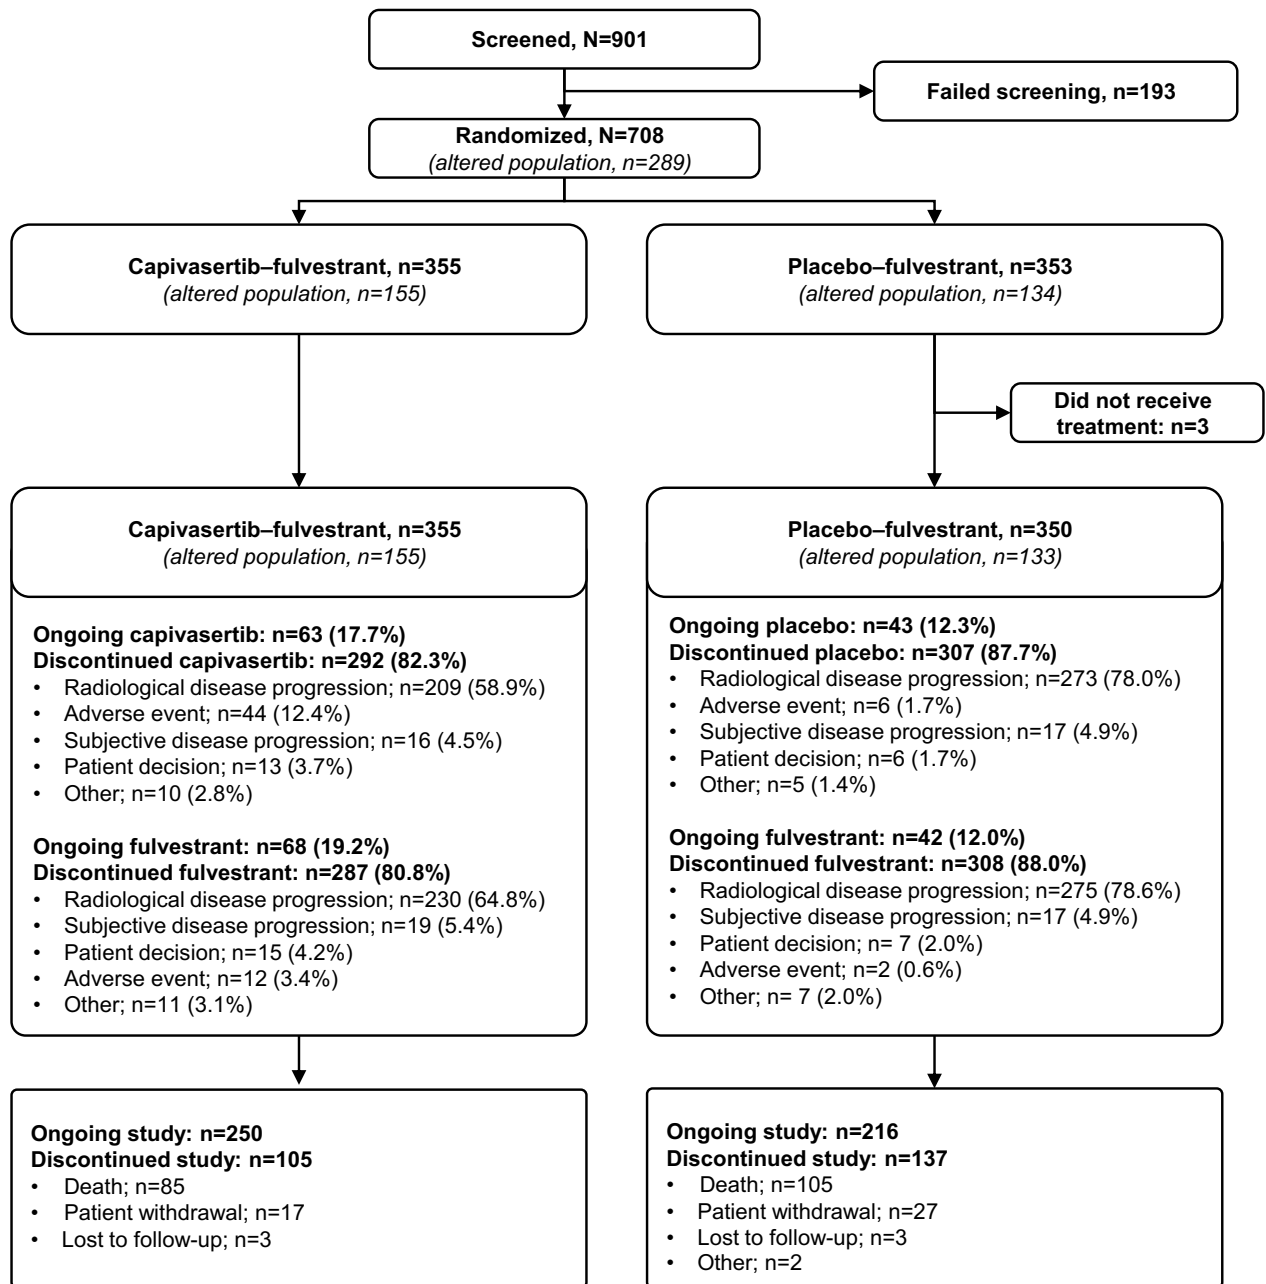

The altered population was defined as patients with AKT pathway (*PIK3CA*, *AKT1*, or *PTEN*) altered tumors determined by next-generation sequencing.

Deaths obtained from public records or survival follow-up.



Figure S2. Investigator-assessed progression-free survival in A) patients with AKT pathway non-altered tumors including unknown NGS result (per protocol) and B) patients with AKT pathway non-altered tumors excluding unknown NGS result (exploratory analysis), and C) only patients with unknown NGS result (*post-hoc* exploratory analysis).

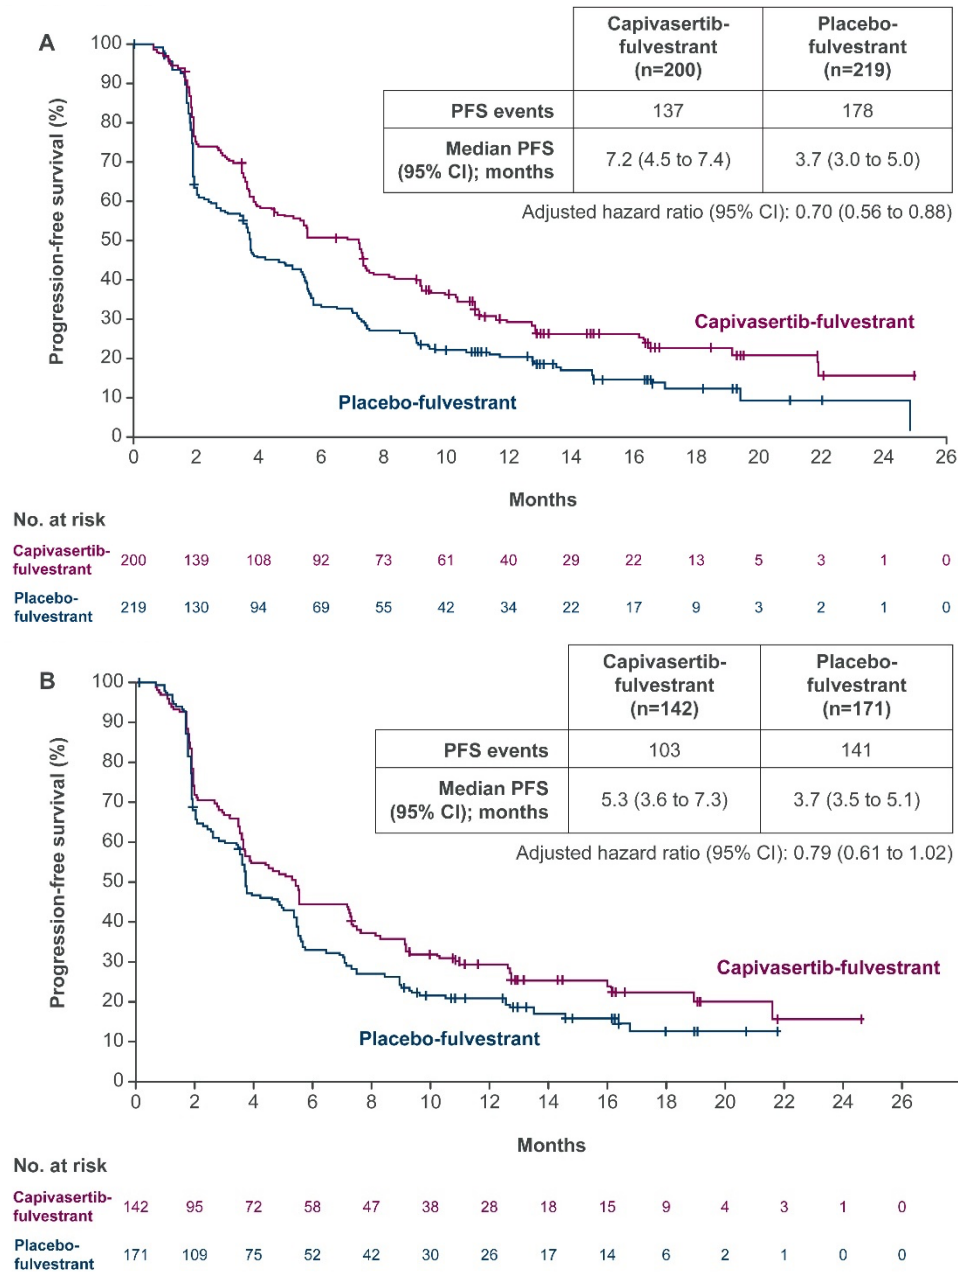

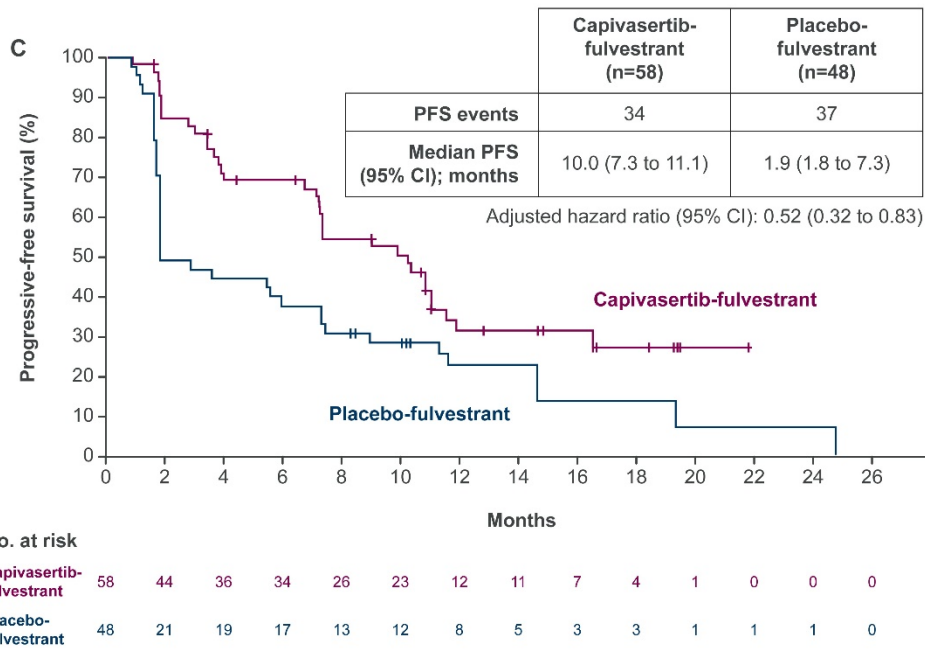

Symbols indicate censored data. Baseline characteristics were broadly comparable between treatment arms in all three populations, however, exploratory/*post-hoc* subgroup analyses should be interpreted with caution.

CI, confidence interval; NGS, next-generation sequencing; PFS, progression-free survival.

Figure S3. Investigator-assessed progression-free survival by subgroup in patients with AKT pathway-altered tumors.

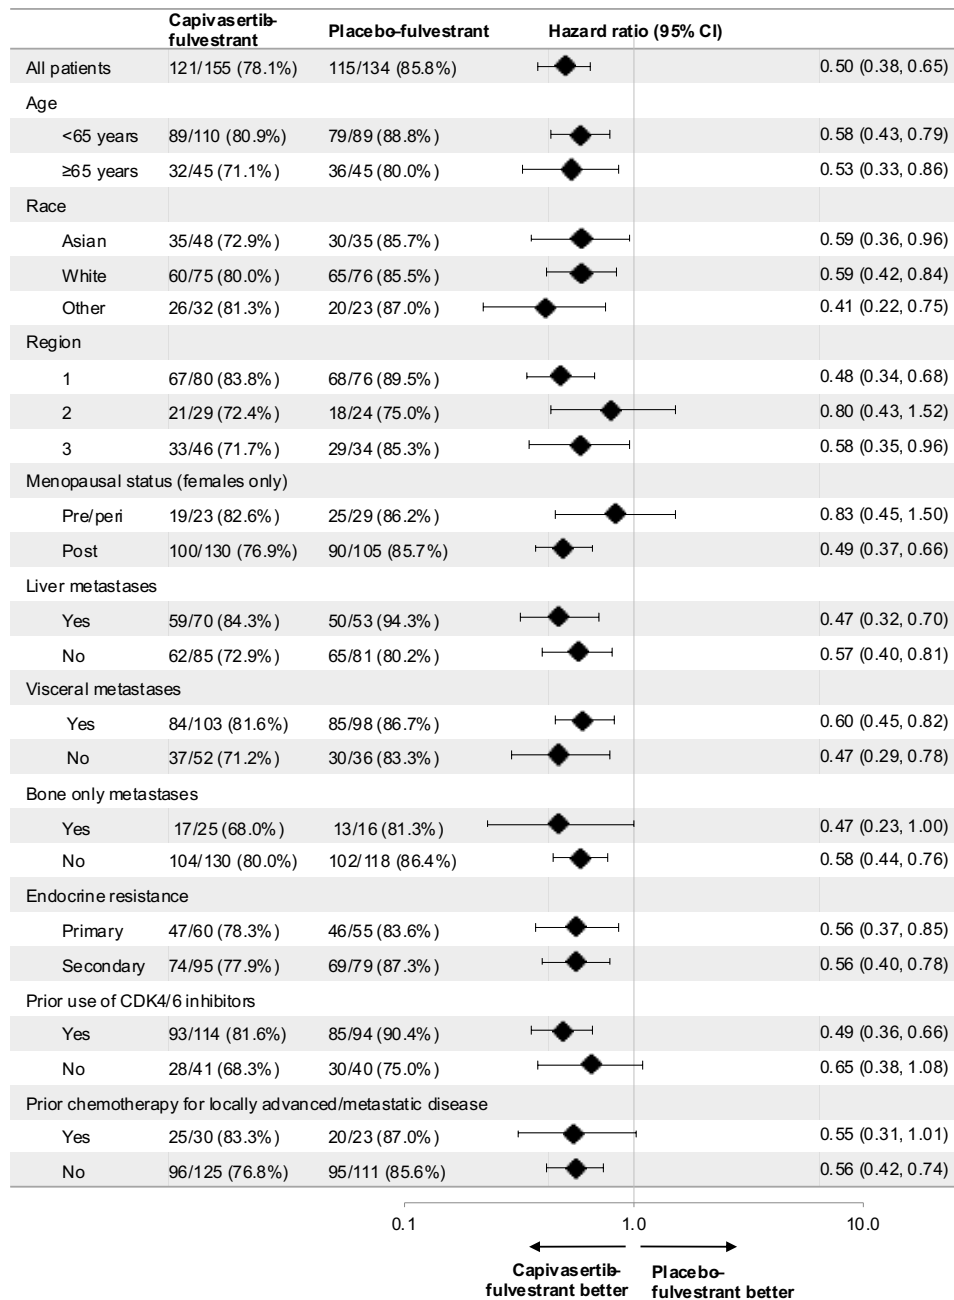

Region 1: United States, Canada, Western Europe, Australia, and Israel; Region 2: Latin America, Eastern Europe, and Russia; Region 3: Asia.

Subgroup analyses within the AKT pathway-altered population were performed at each subgroup level using a Cox proportional hazards model, including treatment term only. Selected subgroups of interest are shown.

CDK4/6, cyclin-dependent kinase 4/6; CI, confidence interval.

Figure S4. Investigator-assessed progression-free survival in the overall population in A) patients with prior CDK4/6 inhibitor exposure and B) patients without prior CDK4/6 inhibitor exposure

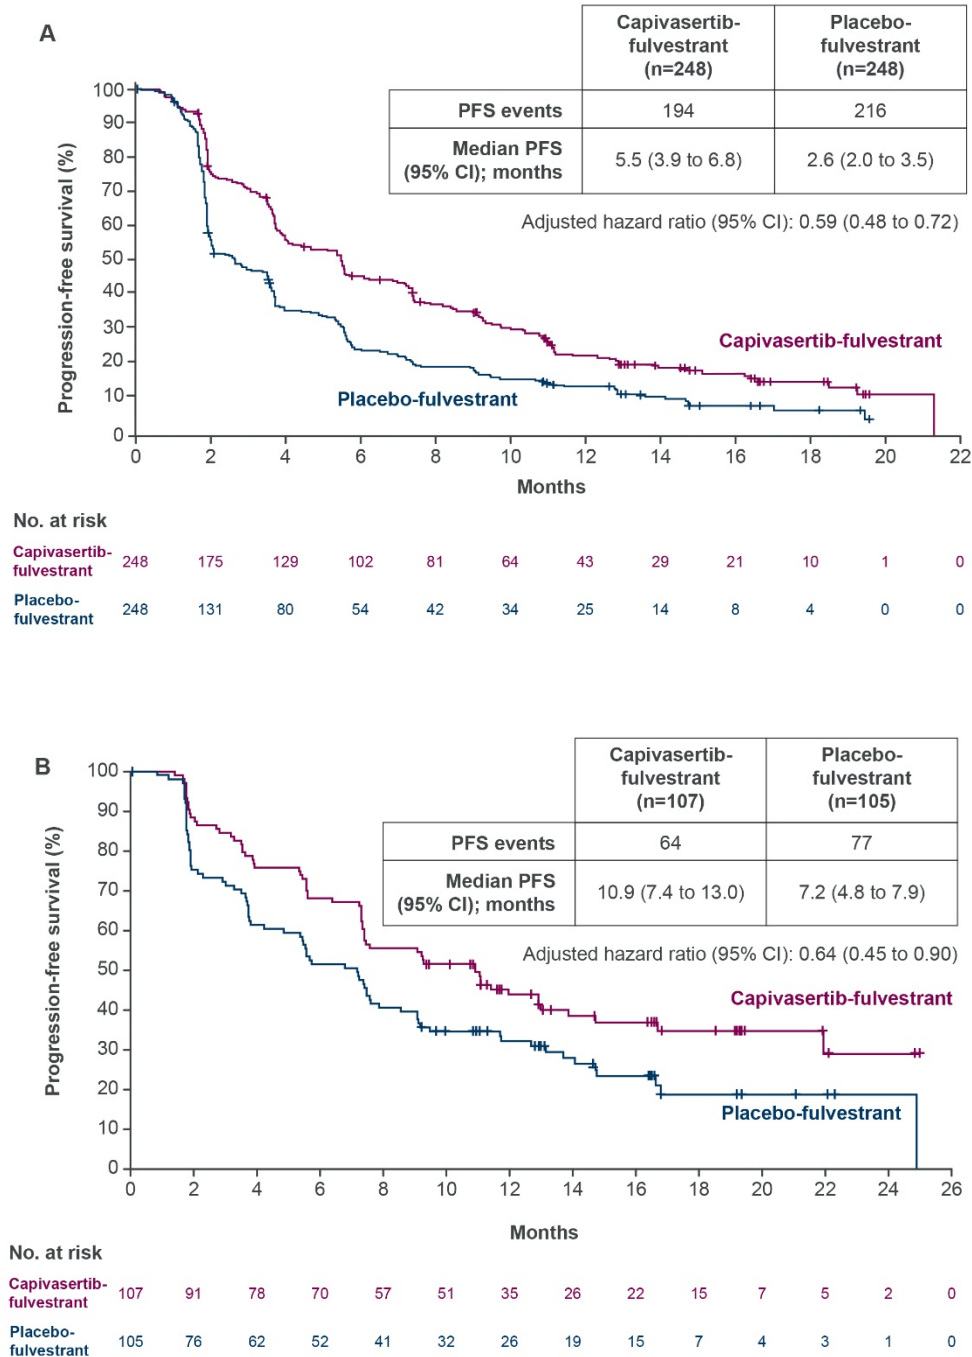

Symbols indicate censored data.

CDK4/6, cyclin-dependent kinase 4/6; CI, confidence interval; PFS, progression-free survival.

Figure S5. Progression-free survival by blinded independent central review in A) the overall population and B) patients with AKT pathway-altered tumors.

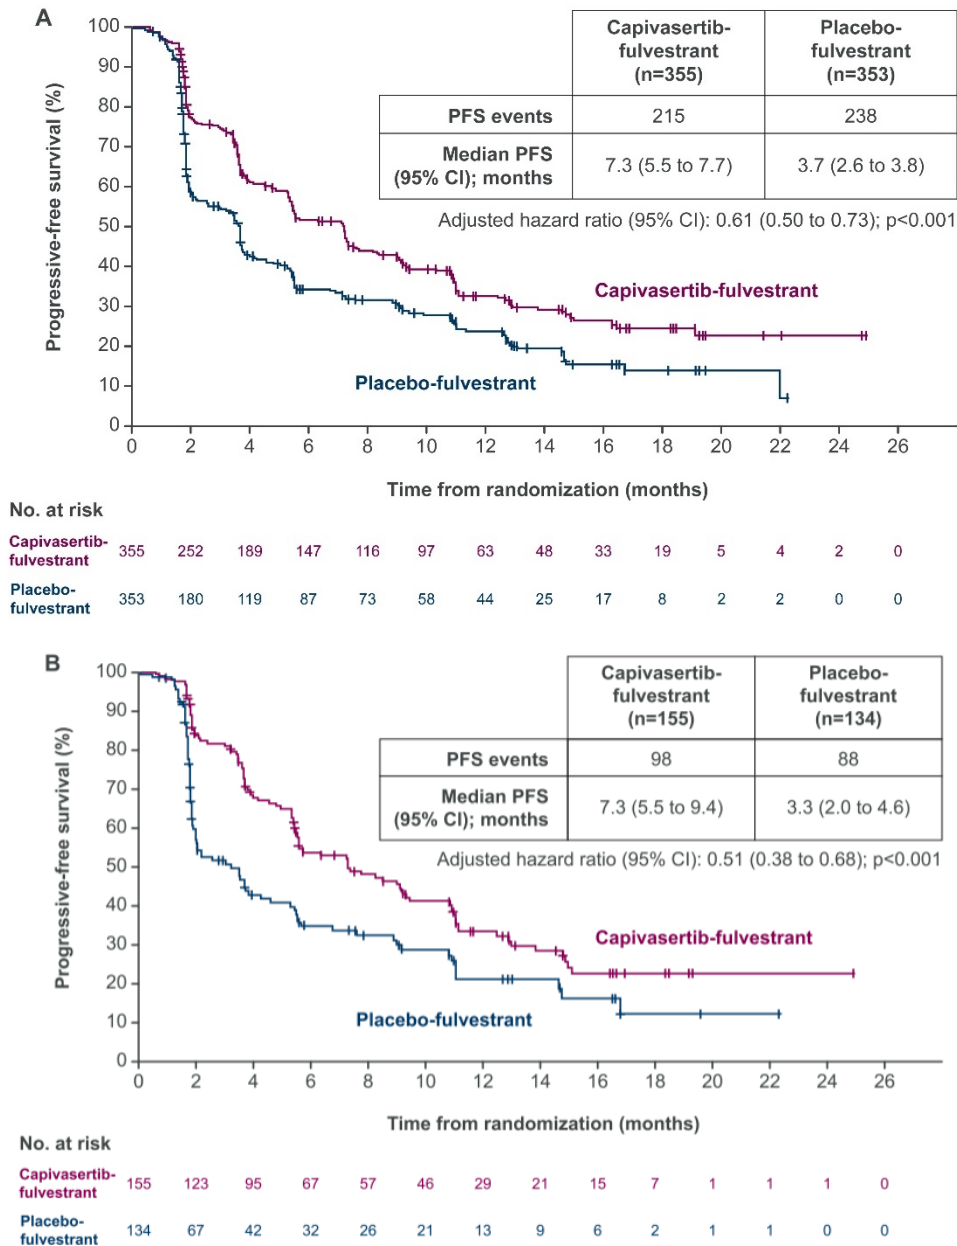

Symbols indicate censored data. HR was estimated using the Cox proportional hazard model stratified by the presence of liver metastases, prior use of CDK4/6 inhibitor, and geographic region in the overall population and by the presence of liver metastases and prior use of CDK4/6 inhibitor in patients with AKT pathway altered tumors.

CI, confidence interval; PFS, progression-free survival.

## SUPPLEMENTAL TABLES

Table S1. AKT pathway alteration status by next-generation sequencing.

| Alteration; n (%)                   |                               | Capivasertib-<br>fulvestrant (n=355) | Placebo-<br>fulvestrant (n=353) |
|-------------------------------------|-------------------------------|--------------------------------------|---------------------------------|
| Any AKT pathway alteration          |                               | 155 (43.7)                           | 134 (38.0)                      |
| <i>PIK3CA</i>                       | Any                           | 116 (32.7)                           | 103 (29.2)                      |
|                                     | <i>PIK3CA</i> only            | 110 (31.0)                           | 92 (26.1)                       |
|                                     | <i>PIK3CA</i> and <i>AKT1</i> | 2 (0.6)                              | 2 (0.6)                         |
|                                     | <i>PIK3CA</i> and <i>PTEN</i> | 4 (1.1)                              | 9 (2.5)                         |
| <i>AKT1</i> only                    |                               | 18 (5.1)                             | 15 (4.2)                        |
| <i>PTEN</i> only                    |                               | 21 (5.9)                             | 16 (4.5)                        |
| AKT pathway non-altered             |                               | 200 (56.3)                           | 219 (62.0)                      |
| AKT pathway alteration not detected |                               | 142 (40.0)                           | 171 (48.4)                      |
| Unknown                             |                               | 58 (16.3)                            | 48 (13.6)                       |
| No sample available                 |                               | 10 (2.8)                             | 4 (1.1)                         |
| Pre-analytical failure              |                               | 39 (11.0)                            | 34 (9.6)                        |
| Post-analytical failure             |                               | 9 (2.5)                              | 10 (2.8)                        |

AKT2, AKT serine/threonine kinase; *PIK3CA*, phosphatidylinositol-4,5-bisphosphate 3-kinase catalytic subunit alpha; *PTEN*, phosphatase and tensin homolog.

Preanalytical failure = sample did not meet sample quality metrics at pathology review or did not meet wet lab processing quality metrics. Postanalytical failure = sample did not meet bioinformatic quality metrics.

Table S2. Representativeness of Study Participants.

| <b>Category</b>                                    | <b>Example</b>                                                                                                                                                                                                                                                                                                                                                                                                                                                                                                                                                                                                                                                                                                                                                             |
|----------------------------------------------------|----------------------------------------------------------------------------------------------------------------------------------------------------------------------------------------------------------------------------------------------------------------------------------------------------------------------------------------------------------------------------------------------------------------------------------------------------------------------------------------------------------------------------------------------------------------------------------------------------------------------------------------------------------------------------------------------------------------------------------------------------------------------------|
| Disease, problem, or condition under investigation | Hormone receptor-positive (HR+), human epidermal growth factor receptor 2-negative (HER2-negative) advanced breast cancer.                                                                                                                                                                                                                                                                                                                                                                                                                                                                                                                                                                                                                                                 |
| Special considerations related to:                 |                                                                                                                                                                                                                                                                                                                                                                                                                                                                                                                                                                                                                                                                                                                                                                            |
| Sex and gender                                     | Breast cancer is more common in women than men, with approximately 99% of all breast cancer cases occurring in women. <sup>1</sup>                                                                                                                                                                                                                                                                                                                                                                                                                                                                                                                                                                                                                                         |
| Age                                                | Globally, the rate of all breast cancers are generally higher in women aged ≥70 years and lowest in women aged <50 years. <sup>2</sup> In the United States, the median age of diagnosis for invasive breast cancer, of any subtype, is 62 years. <sup>3</sup> Patients with HR+/HER2-negative breast cancer are most commonly diagnosed with invasive breast cancer between 50–64 years of age in the United States. <sup>4</sup>                                                                                                                                                                                                                                                                                                                                         |
| Race or ethnic group                               | In the United States, breast cancer is most commonly diagnosed in Black women and White women, with similar incidence rates of 127.8 and 133.7 cases per 100,000, respectively. <sup>3</sup> Overall, women with HR+/HER2-negative breast cancers comprise the highest proportion of women with breast cancer across all racial/ethnic groups in the United States. <sup>3</sup> In women with HR+/HER2-negative breast cancer aged 20 years and older, the age-adjusted incidence rate of breast cancer is highest in White women (141 cases per 100,000), Black women, and American Indian/Alaskan Native women (112 cases per 100,000 each), and lowest in Asian/Pacific Islander women (102 cases per 100,000) and Hispanic women (99 cases per 100,000). <sup>2</sup> |
| Geography                                          | Breast cancer incidence and mortality rates differ by country and region. <sup>5</sup>                                                                                                                                                                                                                                                                                                                                                                                                                                                                                                                                                                                                                                                                                     |
| Other considerations                               | It is important to note that epidemiologic data for advanced HR+/HER2-negative breast cancer is currently limited, hence there is no solid reference point for drawing comparisons between this specific study population and the real-world population.                                                                                                                                                                                                                                                                                                                                                                                                                                                                                                                   |

|                                                 |                                                                                                                                                                                                                                                                                                                                                                                                                                                                                                                                                                                                                                                                                                                                                                                                                                                                                                             |
|-------------------------------------------------|-------------------------------------------------------------------------------------------------------------------------------------------------------------------------------------------------------------------------------------------------------------------------------------------------------------------------------------------------------------------------------------------------------------------------------------------------------------------------------------------------------------------------------------------------------------------------------------------------------------------------------------------------------------------------------------------------------------------------------------------------------------------------------------------------------------------------------------------------------------------------------------------------------------|
| <p>Overall representativeness of this trial</p> | <p>The study cohort sex distribution was representative of the global population of individuals with breast cancer, whereby 99.2% and 98.9% of participants in the capivasertib and placebo arms, respectively, were female.</p> <p>The median age of participants was 58 years (range 26 to 90), which is similar to the median age of onset of invasive breast cancer in the United States (62 years) and aligned with the age in which patients with HR+/HER2-negative breast cancer are most commonly diagnosed (50–64 years).</p> <p>White individuals comprised the majority of study participants, with Black or African American individuals being under-represented.</p> <p>This study had global representation: 56% from Region 1 (United States, Canada, Western Europe, Australia, and Israel), 19% from Region 2 (Latin America, Eastern Europe and Russia), and 25% from Region 3 (Asia)</p> |
|-------------------------------------------------|-------------------------------------------------------------------------------------------------------------------------------------------------------------------------------------------------------------------------------------------------------------------------------------------------------------------------------------------------------------------------------------------------------------------------------------------------------------------------------------------------------------------------------------------------------------------------------------------------------------------------------------------------------------------------------------------------------------------------------------------------------------------------------------------------------------------------------------------------------------------------------------------------------------|



Table S3. Summary of tumor response by investigator assessment and blinded independent central review.

|                                                     | Overall population               |                             | Patients with AKT pathway-altered tumors |                             |
|-----------------------------------------------------|----------------------------------|-----------------------------|------------------------------------------|-----------------------------|
|                                                     | Capivasertib-fulvestrant (n=355) | Placebo-fulvestrant (n=353) | Capivasertib-fulvestrant (n=155)         | Placebo-fulvestrant (n=134) |
| <b>Investigator assessment</b>                      |                                  |                             |                                          |                             |
| No. of patients with measurable disease at baseline | 310                              | 320                         | 132                                      | 124                         |
| Objective response rate — n (%)                     | 71 (22.9)                        | 39 (12.2)                   | 38 (28.8)                                | 12 (9.7)                    |
| Odds ratio (95% CI)*                                | 2.19 (1.42 to 3.36)              |                             | 3.93 (1.93 to 8.04)                      |                             |
| Median (95% CI) duration of response — months       | 9.8 (7.6 to 19.5)                | 8.4 (5.3 to 17.6)           | 9.4 (7.4 to 19.5)                        | 8.6 (3.8 to 9.2)            |
| Best overall response in all patients — n (%)       | 355                              | 353                         | 155                                      | 134                         |
| Complete response                                   | 4 (1.1)                          | 1 (0.3)                     | 3 (1.9)                                  | 0                           |
| Partial response                                    | 68 (19.2)                        | 38 (10.8)                   | 35 (22.6)                                | 12 (9.0)                    |
| Stable disease (≥8 weeks)                           | 187 (52.7)                       | 152 (43.1)                  | 84 (54.2)                                | 55 (41.0)                   |
| Progressive disease                                 | 83 (23.4)                        | 149 (42.2)                  | 31 (20.0)                                | 62 (46.3)                   |
| Non-evaluable                                       | 13 (3.7)                         | 13 (3.7)                    | 2 (1.3)                                  | 5 (3.7)                     |
| Clinical benefit rate† — n (%)                      | 182 (51.3)                       | 111 (31.4)                  | 87 (56.1)                                | 37 (27.6)                   |
| <b>Blinded independent central review</b>           |                                  |                             |                                          |                             |
| Objective response rate — n (%)                     | 69 (19.4)                        | 30 (8.5)                    | 38 (24.5)                                | 10 (7.5)                    |
| Best overall response in all patients — n (%)       |                                  |                             |                                          |                             |
| Complete response                                   | 2 (0.6)                          | 0                           | 1 (0.6)                                  | 0                           |
| Partial response                                    | 67 (18.9)                        | 30 (8.5)                    | 37 (23.9)                                | 10 (7.5)                    |
| Stable disease (≥8 weeks)                           | 182 (51.3)                       | 157 (44.5)                  | 82 (52.9)                                | 54 (40.3)                   |
| Progressive disease                                 | 86 (24.2)                        | 145 (41.1)                  | 31 (20.0)                                | 60 (44.8)                   |
| Non-evaluable                                       | 17 (4.8)                         | 19 (5.4)                    | 3 (1.9)                                  | 9 (6.7)                     |

\*Analysis was performed using logistic regression adjusted for liver metastases (yes vs. no), prior use of CDK4/6 inhibitors (yes vs. no) in patients with measurable disease in the overall population, and prior use of CDK4/6 inhibitors (yes vs. no) in patients with measurable disease in the altered population.

†Clinical benefit rate, a secondary objective, was defined the percentage of patients who have a complete or partial response, stable disease per RECIST v1.1 (without subsequent cancer therapy) maintained ≥24 weeks after randomization.

CI, confidence interval.

Table S4. Serious adverse events in the overall population.\*

| Serious adverse events — no. (%)                      | Capivasertib-fulvestrant<br>(n=355) | Placebo-fulvestrant<br>(n=350) |
|-------------------------------------------------------|-------------------------------------|--------------------------------|
| Patients with any SAE                                 | 57 (16.1)                           | 28 (8.0)                       |
| Diarrhea                                              | 6 (1.7)                             | 1 (0.3)                        |
| Rash maculo-papular                                   | 5 (1.4)                             | 0                              |
| Vomiting                                              | 4 (1.1)                             | 2 (0.6)                        |
| Acute kidney injury                                   | 3 (0.8)                             | 0                              |
| Hyperglycemia                                         | 3 (0.8)                             | 0                              |
| Platelet count decreased                              | 0                                   | 3 (0.9)                        |
| Sepsis                                                | 2 (0.6)                             | 1 (0.3)                        |
| Asthenia                                              | 2 (0.6)                             | 0                              |
| Pneumonia aspiration                                  | 2 (0.6)                             | 0                              |
| Hypercalcemia                                         | 1 (0.3)                             | 2 (0.6)                        |
| Nausea                                                | 1 (0.3)                             | 2 (0.6)                        |
| COVID-19                                              | 1 (0.3)                             | 1 (0.3)                        |
| Drug-induced liver injury                             | 1 (0.3)                             | 1 (0.3)                        |
| Herpes zoster                                         | 1 (0.3)                             | 1 (0.3)                        |
| Pain in extremity                                     | 1 (0.3)                             | 1 (0.3)                        |
| Pleural effusion                                      | 1 (0.3)                             | 1 (0.3)                        |
| Pneumonia                                             | 1 (0.3)                             | 1 (0.3)                        |
| Pyrexia                                               | 1 (0.3)                             | 1 (0.3)                        |
| Acute myocardial infarction                           | 1 (0.3)                             | 0                              |
| Acute respiratory failure                             | 1 (0.3)                             | 0                              |
| Adenocarcinoma of colon                               | 1 (0.3)                             | 0                              |
| Anaphylactic reaction                                 | 1 (0.3)                             | 0                              |
| Arthralgia                                            | 1 (0.3)                             | 0                              |
| Atrial fibrillation                                   | 1 (0.3)                             | 0                              |
| Back pain                                             | 1 (0.3)                             | 0                              |
| Bacterial colitis                                     | 1 (0.3)                             | 0                              |
| Bladder transitional cell carcinoma                   | 1 (0.3)                             | 0                              |
| Body temperature increased                            | 1 (0.3)                             | 0                              |
| Cerebral hemorrhage                                   | 1 (0.3)                             | 0                              |
| Cerebral infarction                                   | 1 (0.3)                             | 0                              |
| Cerebrovascular accident                              | 1 (0.3)                             | 0                              |
| Deep vein thrombosis                                  | 1 (0.3)                             | 0                              |
| Dehydration                                           | 1 (0.3)                             | 0                              |
| Dermatitis exfoliative generalized                    | 1 (0.3)                             | 0                              |
| Diabetic ketoacidosis                                 | 1 (0.3)                             | 0                              |
| Diabetic metabolic decompensation                     | 1 (0.3)                             | 0                              |
| Drug eruption                                         | 1 (0.3)                             | 0                              |
| Drug hypersensitivity                                 | 1 (0.3)                             | 0                              |
| Drug reaction with eosinophilia and systemic symptoms | 1 (0.3)                             | 0                              |
| Endometrial cancer                                    | 1 (0.3)                             | 0                              |
| Erythema multiforme                                   | 1 (0.3)                             | 0                              |

|                                      |         |         |
|--------------------------------------|---------|---------|
| Fatigue                              | 1 (0.3) | 0       |
| Femur fracture                       | 1 (0.3) | 0       |
| Hepatitis B reactivation             | 1 (0.3) | 0       |
| Hordeolum                            | 1 (0.3) | 0       |
| Infectious pleural effusion          | 1 (0.3) | 0       |
| Injection site abscess               | 1 (0.3) | 0       |
| Nephrolithiasis                      | 1 (0.3) | 0       |
| Osteonecrosis of jaw                 | 1 (0.3) | 0       |
| Peritonitis                          | 1 (0.3) | 0       |
| Pneumonia bacterial                  | 1 (0.3) | 0       |
| Pneumonia pneumococcal               | 1 (0.3) | 0       |
| Pyelonephritis                       | 1 (0.3) | 0       |
| Rash                                 | 1 (0.3) | 0       |
| Rash erythematous                    | 1 (0.3) | 0       |
| Rash papular                         | 1 (0.3) | 0       |
| Renal failure                        | 1 (0.3) | 0       |
| Retroperitoneal fibrosis             | 1 (0.3) | 0       |
| Skin infection                       | 1 (0.3) | 0       |
| Stomatitis                           | 1 (0.3) | 0       |
| Supraventricular extrasystoles       | 1 (0.3) | 0       |
| Syncope                              | 1 (0.3) | 0       |
| Toxicity to various agents           | 1 (0.3) | 0       |
| Tumor associated fever               | 1 (0.3) | 0       |
| Urinary tract infection              | 1 (0.3) | 0       |
| Visceral pain                        | 1 (0.3) | 0       |
| Abdominal pain                       | 0       | 1 (0.3) |
| Anemia                               | 0       | 1 (0.3) |
| Aspartate aminotransferase increased | 0       | 1 (0.3) |
| Confusional state                    | 0       | 1 (0.3) |
| Cytomegalovirus infection            | 0       | 1 (0.3) |
| Device intolerance                   | 0       | 1 (0.3) |
| Dizziness                            | 0       | 1 (0.3) |
| Femoral neck fracture                | 0       | 1 (0.3) |
| Forearm fracture                     | 0       | 1 (0.3) |
| Humerus fracture                     | 0       | 1 (0.3) |
| Ileus                                | 0       | 1 (0.3) |
| Non-small cell lung cancer           | 0       | 1 (0.3) |
| Pathological fracture                | 0       | 1 (0.3) |
| Pneumothorax                         | 0       | 1 (0.3) |
| Respiratory failure                  | 0       | 1 (0.3) |
| Small cell lung cancer               | 0       | 1 (0.3) |

\*Adverse events are reported regardless of the relationship to the study drugs.

## REFERENCES

1. Organization WH. Breast cancer. ([https://www.who.int/news-room/fact-sheets/detail/breast-cancer#:~:text=Breast%20cancer%20arises%20in%20the,potential%20for%20spread%20\(metastasis\).](https://www.who.int/news-room/fact-sheets/detail/breast-cancer#:~:text=Breast%20cancer%20arises%20in%20the,potential%20for%20spread%20(metastasis).)).
2. Li Y, Zheng J, Deng Y, et al. Global Burden of Female Breast Cancer: Age-Period-Cohort Analysis of Incidence Trends From 1990 to 2019 and Forecasts for 2035. *Front Oncol* 2022;12:891824.
3. Giaquinto AN, Sung H, Miller KD, et al. Breast Cancer Statistics, 2022. *CA Cancer J Clin* 2022;72(6):524–541.
4. Howlader N, Altekruse SF, Li CI, et al. US incidence of breast cancer subtypes defined by joint hormone receptor and HER2 status. *J Natl Cancer Inst* 2014;106(5):dju055. DOI: 10.1093/jnci/dju055.
5. Arnold MM, E. Rumgay, H. Mafra, A. Singh, D. Laversanne, M. Vignat, J. Gralow, J.R. Cardoso, F. Siesling, S. Soerjomataram, I. Current and future burden of breast cancer: Global statistics for 2020 and 2040. *Breast* 2022;66:15–23.
